# Supplementary material
Source: PubMed Central journal article supplement (PMC2906544)
Supplement: 0911841107_pnas.200911841SI.pdf [file 0911841107_pnas.200911841SI.pdf]

# Supporting Information

Bonebrake and Mastrandrea 10.1073/pnas.0911841107

**Table S1.** ERCCI calculation based on wet season (WS) and dry season (DS) calculations of relative fitness changes ( $\Delta w$ ) and change in climatic interannual variability ( $\Delta\sigma$ ) calculated by Giorgi [Giorgi F (2006) *Geophys Res Lett* 33:L08707]

| Region | $\Delta w_p WS$ | $\Delta\sigma_p WS, \%$ | $\Delta w_t WS$ | $\Delta\sigma_t WS, \%$ | $\Delta w_p DS$ | $\Delta\sigma_p DS, \%$ | $\Delta w_t DS$ | $\Delta\sigma_t DS, \%$ | ERCCI |
|--------|-----------------|-------------------------|-----------------|-------------------------|-----------------|-------------------------|-----------------|-------------------------|-------|
| NEU    | 0.02(0)         | 17.39(2)                | 0.34(0)         | 15.09(4)                | 1.86(2)         | 6.69(1)                 | 0.54(1)         | -19.54(4)               | 14    |
| MED    | 1.95(2)         | 24.94(4)                | 0.38(0)         | -3.43(0)                | 2.12(4)         | 40.00(4)                | 0.68(1)         | 15.25(4)                | 19    |
| NEE    | 1.49(1)         | 23.23(4)                | 0.34(0)         | 4.19(0)                 | 2.37(4)         | 16.71(2)                | 0.70(1)         | -12.40(4)               | 14    |
| NAS    | 1.93(2)         | 14.69(2)                | 0.25(0)         | 3.39(0)                 | 2.07(4)         | 9.41(1)                 | 0.49(0)         | 5.28(1)                 | 10    |
| CAS    | 0.16(0)         | 21.89(4)                | 0.37(0)         | 2.02(0)                 | 1.65(2)         | 16.13(2)                | 0.542(1)        | 4.31(0)                 | 9     |
| TIB    | 1.18(1)         | 3.15(0)                 | 0.41(0)         | 3.00(0)                 | 1.81(2)         | 12.62(2)                | 0.48(0)         | 3.61(0)                 | 5     |
| EAS    | 1.46(1)         | 9.81(1)                 | 0.30(0)         | 3.03(0)                 | 1.23(1)         | 17.52(2)                | 0.35(0)         | 2.09(0)                 | 5     |
| SAS    | 2.05(4)         | 2.23(0)                 | 0.62(1)         | 4.89(0)                 | 0.25(0)         | 8.82(1)                 | 0.89(1)         | 9.99(1)                 | 8     |
| SEA    | 1.25(1)         | 12.25(2)                | 1.12(2)         | -2.95(0)                | 1.05(1)         | 20.26(4)                | 1.07(2)         | 14.97(2)                | 14    |
| NAU    | 0.43(0)         | -1.07(0)                | 0.64(1)         | 8.61(1)                 | 1.77(2)         | 10.99(2)                | 0.68(1)         | 3.96(0)                 | 7     |
| SAU    | 2.30(4)         | 20.52(4)                | 0.44(0)         | 14.81(2)                | 0.48(0)         | 5.58(1)                 | 0.52(1)         | 8.08(1)                 | 13    |
| SAH    | 1.77(2)         | 19.71(2)                | 0.65(1)         | 7.36(1)                 | 0.51(0)         | 2.80(0)                 | 0.86(1)         | 5.20(1)                 | 8     |
| WAF    | 0.04(0)         | 6.11(1)                 | 1.54(4)         | 6.88(1)                 | 0.01(0)         | 11.87(2)                | 1.59(4)         | 12.56(2)                | 14    |
| EAF    | 0.59(0)         | 2.01(2)                 | 1.40(2)         | 10.89(2)                | 1.67(2)         | 1.92(0)                 | 1.38(2)         | 1.34(0)                 | 8     |
| EQF    | 1.68(2)         | -3.85(2)                | 1.33(2)         | 7.26(1)                 | 1.73(2)         | -7.41(1)                | 1.29(2)         | 2.69(0)                 | 10    |
| SQF    | 0.10(0)         | 20.74(4)                | 1.34(2)         | 15.99(4)                | 1.16(1)         | 4.63(0)                 | 1.56(4)         | 12.17(2)                | 17    |
| SAF    | 0.02(0)         | -4.31(0)                | 0.78(1)         | -6.67(1)                | 1.89(2)         | 14.32(2)                | 0.82(1)         | 5.04(1)                 | 8     |
| ALA    | 2.10(4)         | 3.28(0)                 | 0.32(0)         | -3.86(0)                | 2.14(4)         | -2.12(0)                | 0.55(1)         | -5.51(1)                | 10    |
| GRL    | 2.35(4)         | 1.67(0)                 | 0.38(0)         | -14.96(2)               | 2.32(4)         | 9.26(1)                 | 0.60(1)         | -5.37(1)                | 13    |
| WNA    | 0.94(0)         | 7.09(1)                 | 0.48(0)         | -6.42(1)                | 1.36(1)         | 8.63(1)                 | 0.65(1)         | 7.1(1)                  | 6     |
| CNA    | 0.11(0)         | 18.80(2)                | 0.48(0)         | 10.37(2)                | 0.95(0)         | 6.68(1)                 | 0.40(0)         | -8.98(1)                | 6     |
| ENA    | 1.09(1)         | 19.18(2)                | 0.40(0)         | 8.58(1)                 | 2.59(4)         | 11.99(2)                | 0.44(0)         | -12.18(2)               | 12    |
| CAM    | 1.55(2)         | 15.20(2)                | 0.97(1)         | 6.65(1)                 | 1.93(2)         | 26.67(4)                | 1.03(2)         | 7.36(1)                 | 15    |
| AMZ    | 0.66(0)         | 1.81(0)                 | 1.36(2)         | 3.73(0)                 | 0.81(0)         | 16.61(2)                | 1.73(4)         | 9.39(1)                 | 9     |
| CSA    | 0.61(0)         | 8.06(1)                 | 0.74(1)         | 4.44(0)                 | 0.29(0)         | 17.67(2)                | 0.65(1)         | 5.74(1)                 | 6     |
| SSA    | 0.00(0)         | 8.03(1)                 | 0.29(0)         | -12.56(2)               | 2.44(4)         | 9.70(1)                 | 0.37(0)         | 4.82(0)                 | 8     |

Factor  $n$  in parentheses. See ref. 1 for regional and seasonal extent clarification.

1. Giorgi F, Bi X (2005) Updated regional precipitation and temperature changes for the 21st century from ensembles of recent AOGCM simulations. *Geophys Res Lett* 32:L21715.
